# Supplementary material for: Association between APOE ε4 Genotype and Memory Impairment in Elderly with Normal Global Cognitive Assessment
Source: Diagnostics (Basel). 2015 Dec 15;5(4):615–23. doi: 10.3390/diagnostics5040615 (PMC4728477; doi:10.3390/diagnostics5040615)
Supplement: Supplementary File 1 [file diagnostics-05-00615-s001.pdf]

# Supplementary Materials

**Table S1.** MMSE adjusted with age and educational level (mean and standard deviation).

| Education Level (Years) | Age (Years) |          |          |          |
|-------------------------|-------------|----------|----------|----------|
|                         | 60–65       | 66–70    | 71–75    | >75      |
| No Formal Education     | 17 (4.3)    | 16 (4.9) | 16 (3.5) | 14 (4.5) |
| 1–5                     | 23 (4.4)    | 23 (5.2) | 22 (5.1) | 21 (4.6) |
| 6–8                     | 26 (2.9)    | 25 (4.3) | 23 (4.4) | 23 (4.3) |
| 9–10                    | 27 (2.4)    | 26 (4.2) | 26 (3.4) | 24 (6.3) |
| >12                     | 27 (3.3)    | 28 (1.7) | 27 (2.8) | 25 (4.4) |

This table is the simplified version of reference number 3;  $n = 1001$  subjects, MMSE = Mini-Mental State Examination.
